# Supplementary material
Source: PubMed Central journal article supplement (PMC6791424)
Supplement: koni-08-10-1629780-s003.pdf [file koni-08-10-1629780-s003.pdf]

|         | Gene     | Correlation coefficient | One-sided significance |
|---------|----------|-------------------------|------------------------|
| MHC I   | HLA-A    | <b>0.129</b>            | <b>1.9E-05</b>         |
|         | HLA-B    | <b>0.119</b>            | <b>7.1E-05</b>         |
|         | HLA-C    | 0.052                   | 0.047                  |
|         | HLA-H    | 0.113                   | 1.5E-04                |
| MHC II  | HLA-J    | -0.111                  | 1.9E-04                |
|         | HLA-DRA  | 0.092                   | 0.0015                 |
|         | HLA-DQA1 | 0.092                   | 0.0016                 |
|         | HLA-E    | 0.087                   | 0.0025                 |
|         | HLA-DOB  | 0.087                   | 0.0026                 |
|         | HLA-F    | 0.085                   | 0.0033                 |
|         | HLA-DMA  | 0.078                   | 0.0063                 |
|         | HLA-DQA2 | 0.078                   | 0.0064                 |
|         | HLA-DMB  | 0.074                   | 0.0088                 |
|         | HLA-DQB1 | 0.073                   | 0.0093                 |
|         | HLA-DRB1 | 0.073                   | 0.0100                 |
|         | HLA-DPB2 | 0.072                   | 0.011                  |
|         | HLA-L    | 0.071                   | 0.011                  |
|         | HLA-G    | 0.061                   | 0.025                  |
|         | HLA-DRB6 | 0.057                   | 0.034                  |
|         | HLA-DRB5 | 0.052                   | 0.047                  |
|         | HLA-DPA1 | 0.046                   | 0.069                  |
|         | HLA-DPB1 | 0.030                   | 0.169                  |
|         | HLA-DQB2 | 0.028                   | 0.183                  |
| HLA-DOA | -0.006   | 0.429                   |                        |

Supplementary Figure 1
