# Supplementary material
Source: PubMed Central journal article supplement (PMC6791424)

A

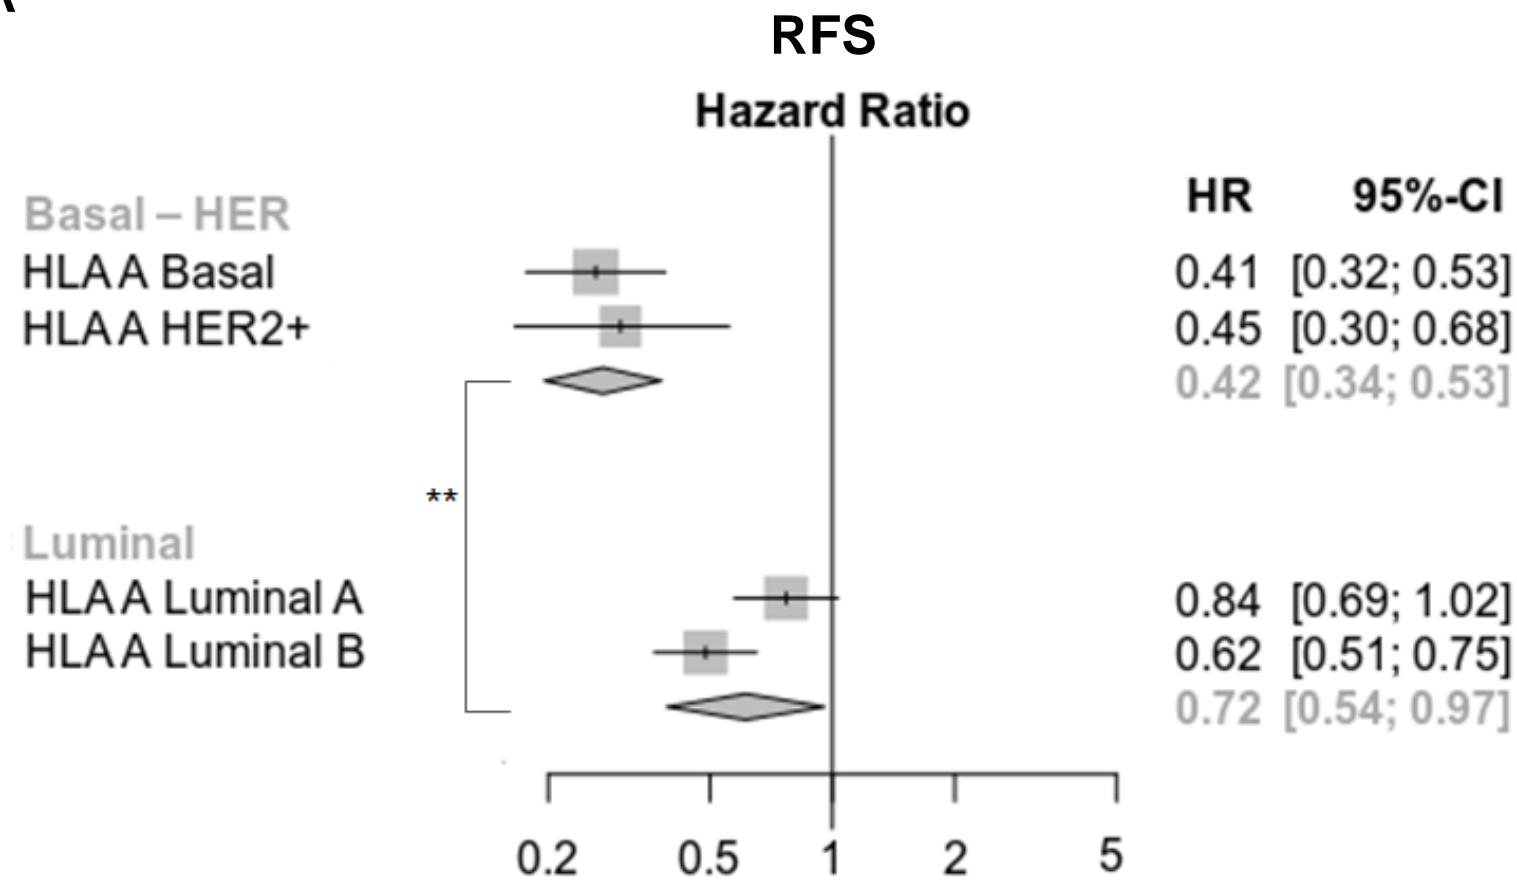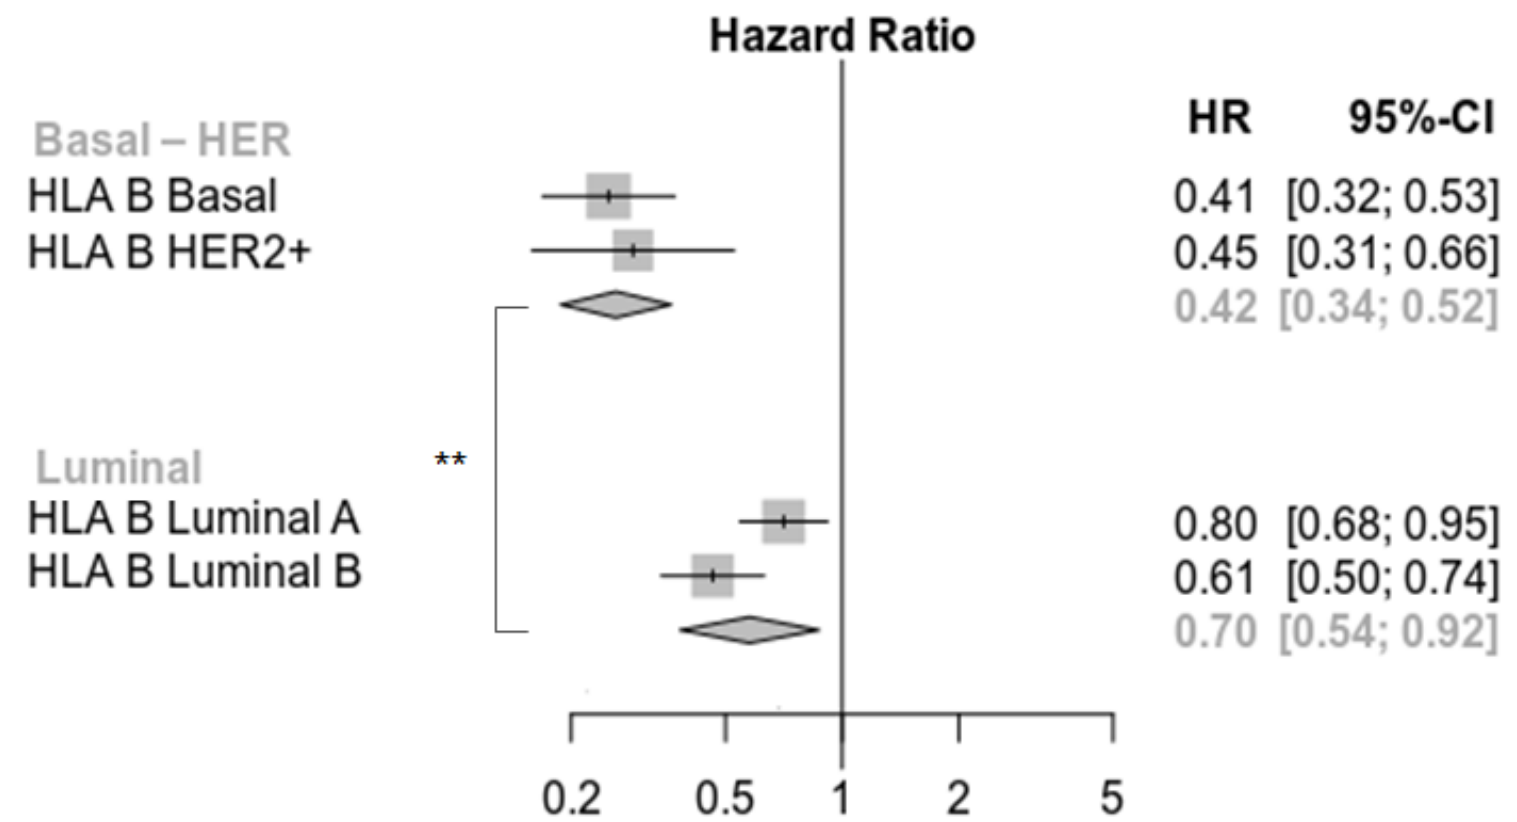

B

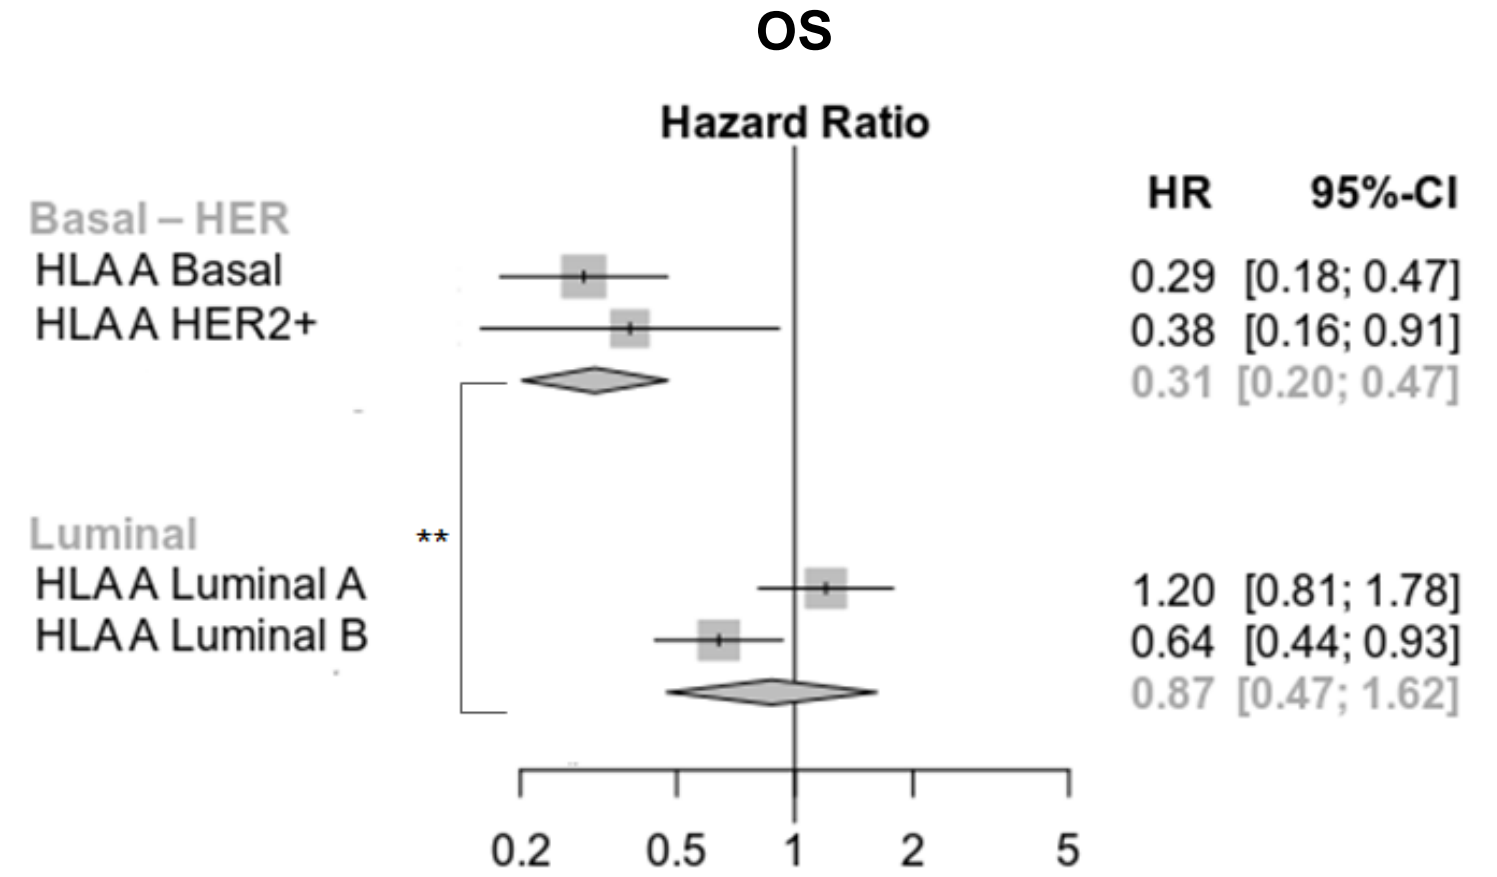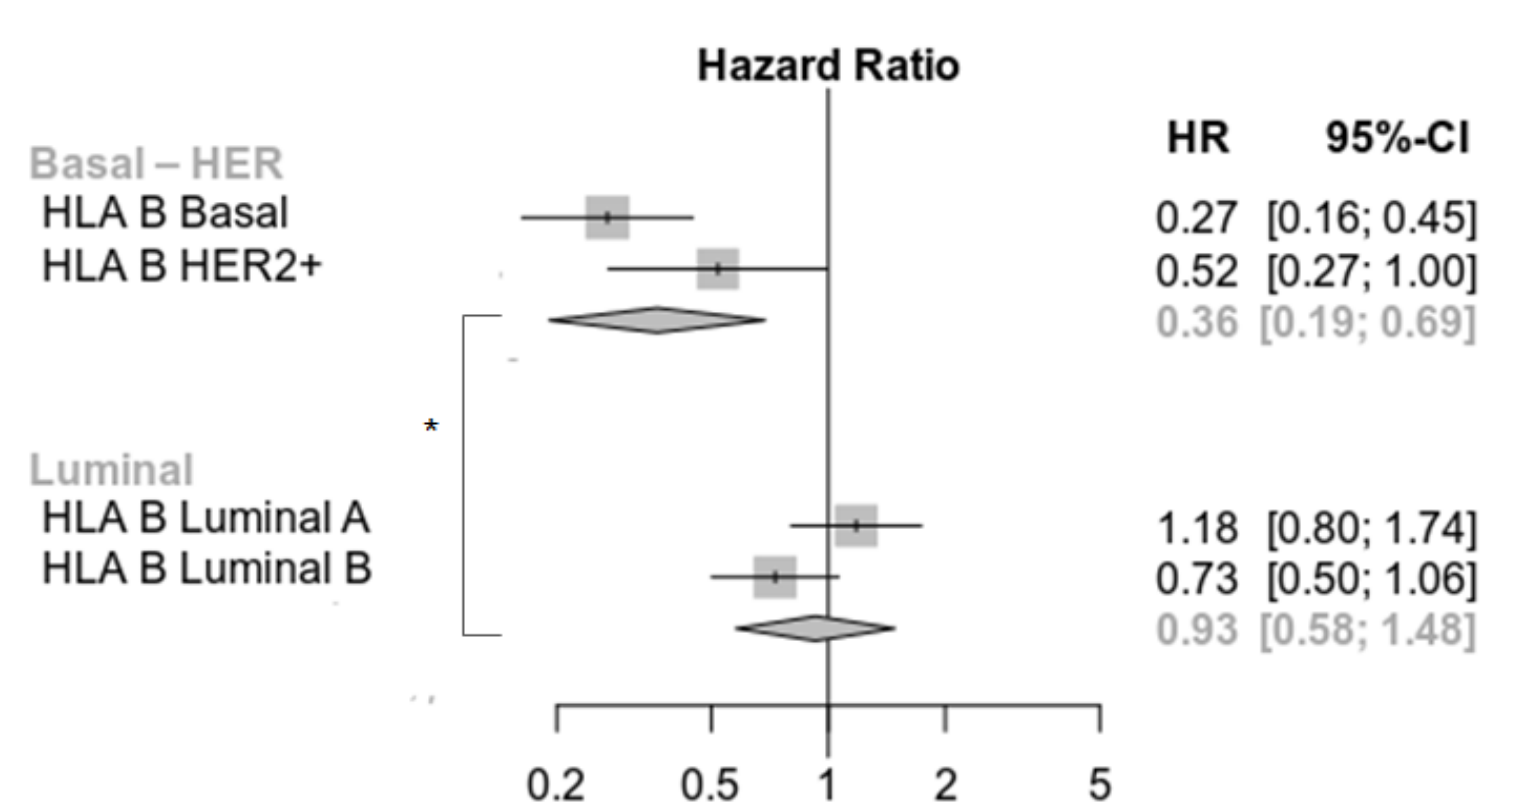

Supplement: koni-08-10-1629780-s001.pdf [file koni-08-10-1629780-s001.pdf]

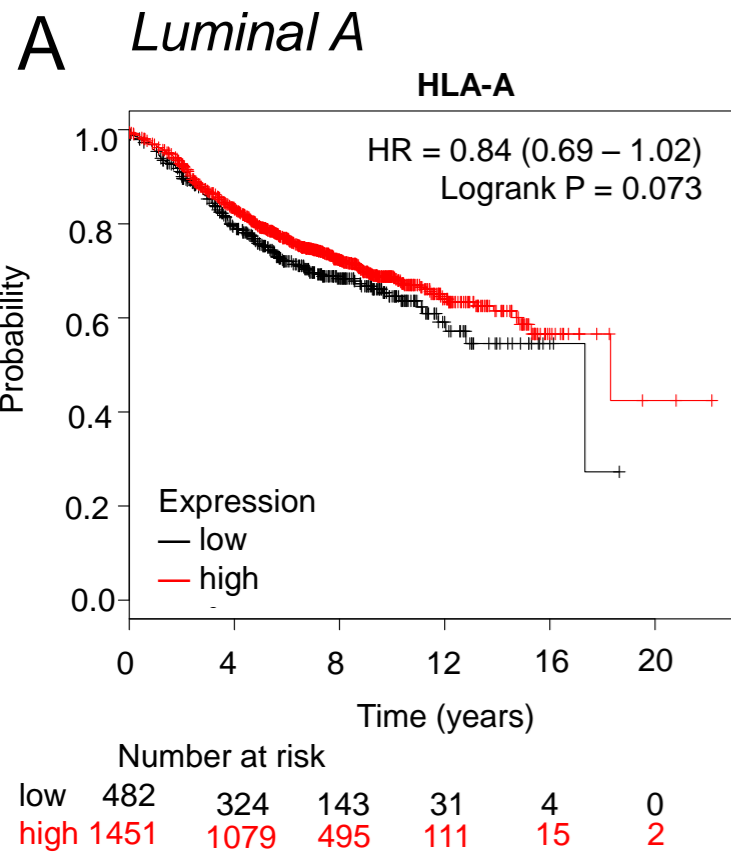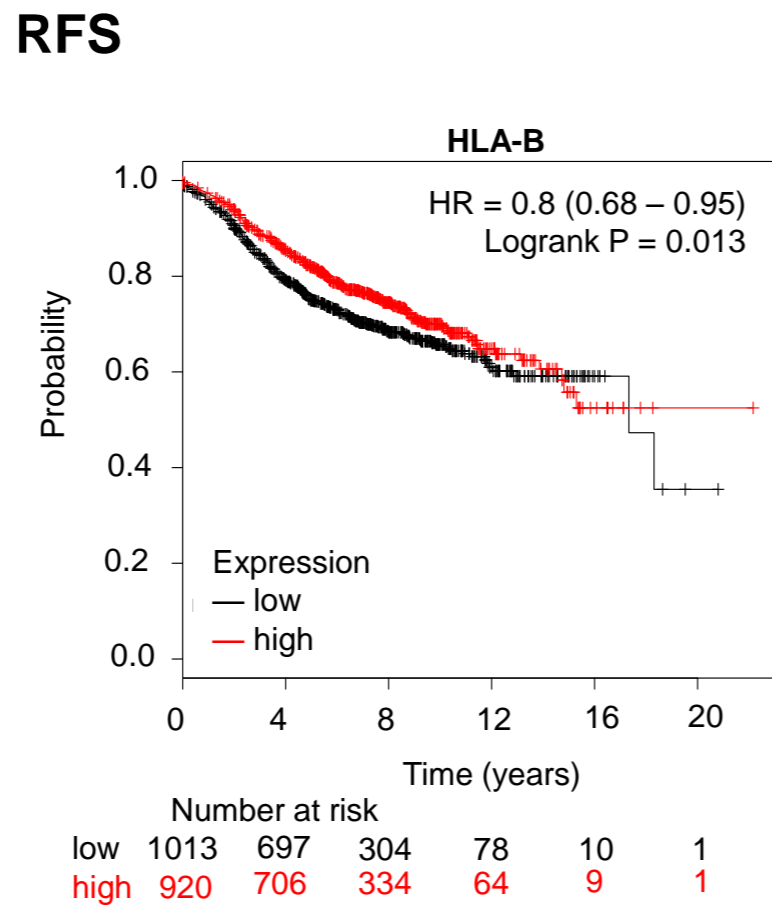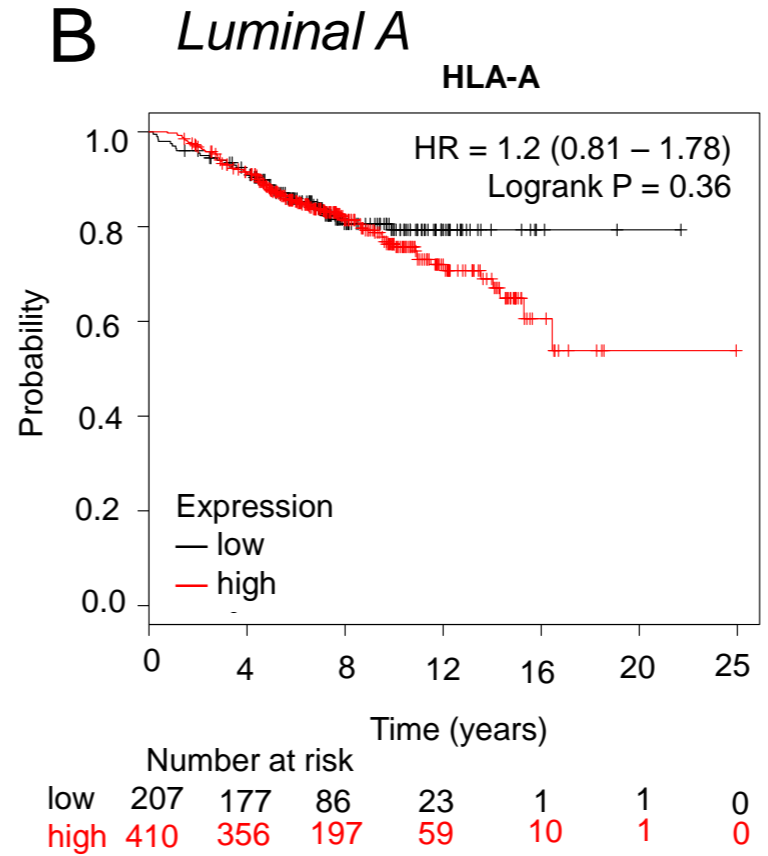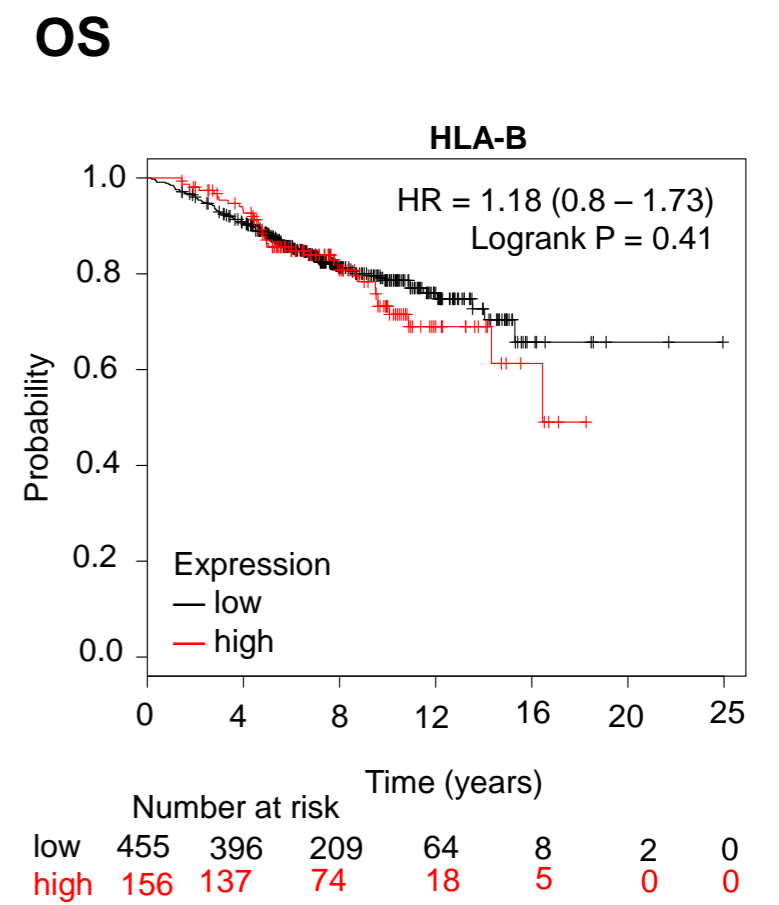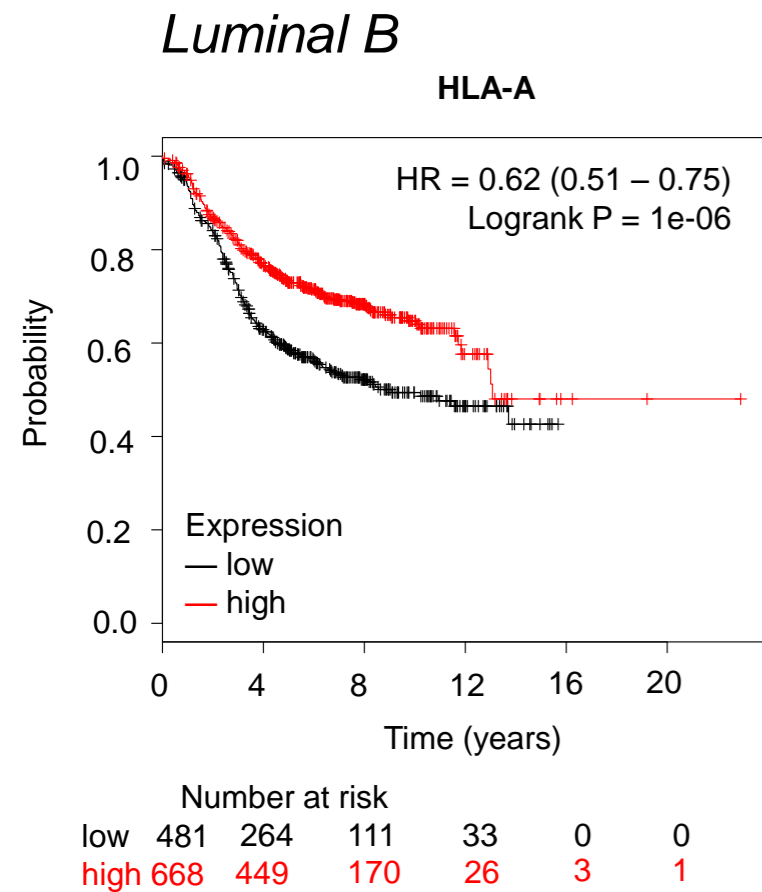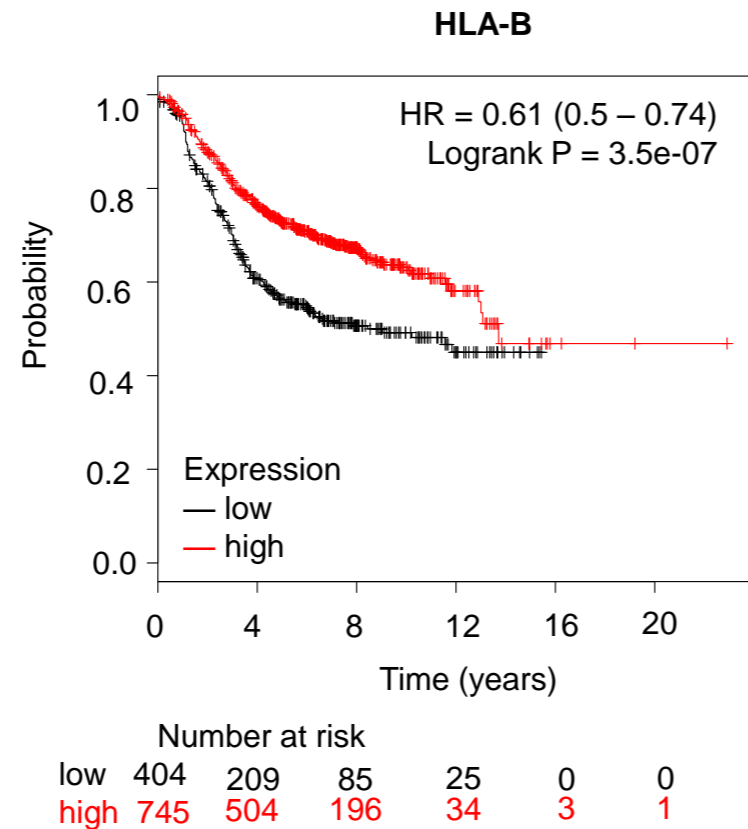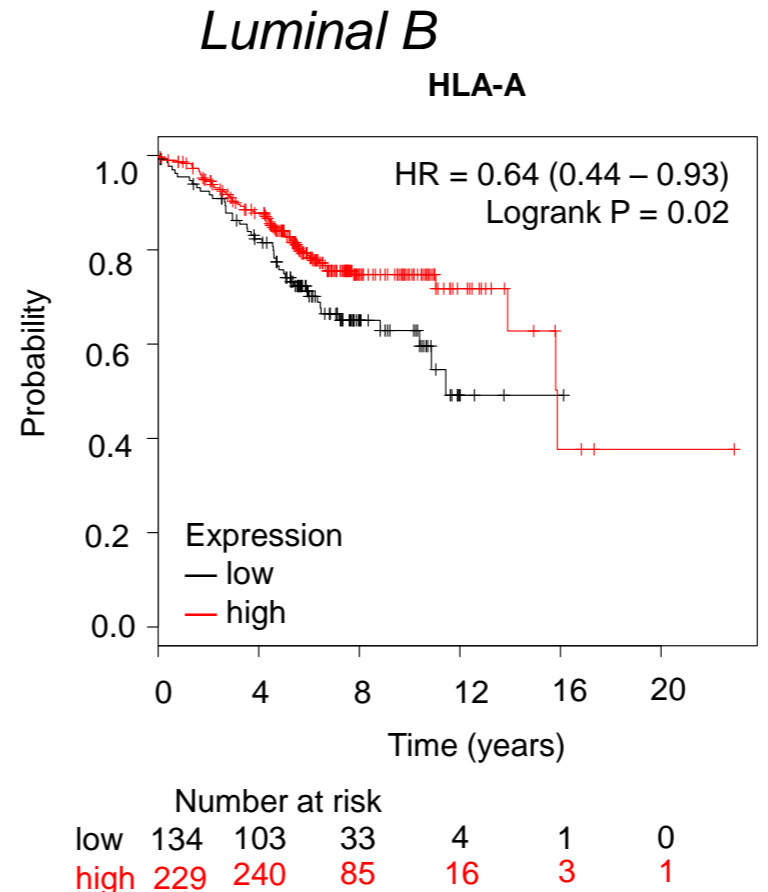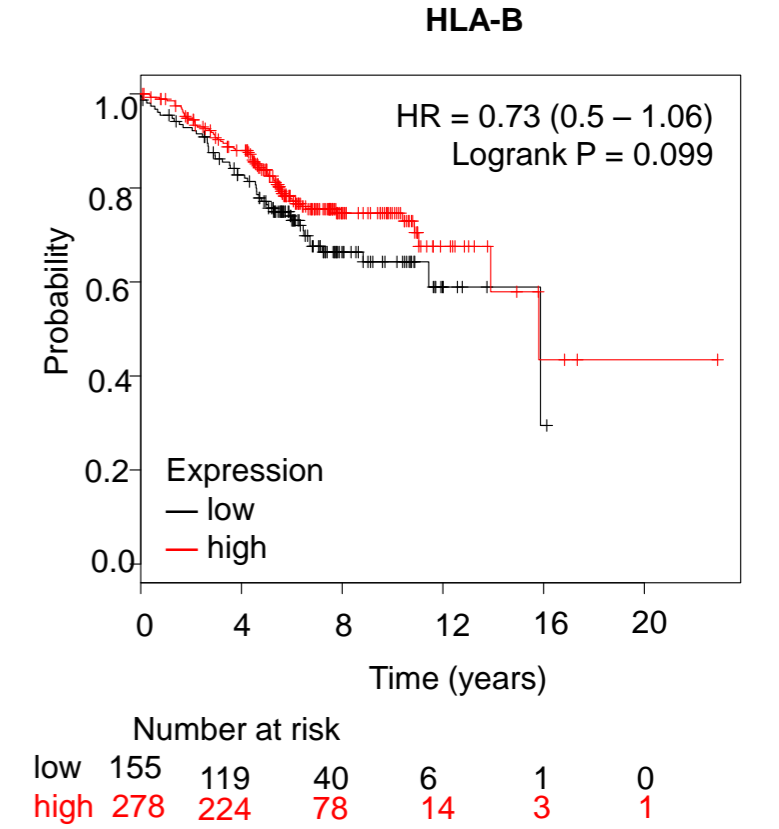

Supplementary Figure 2

Supplement: koni-08-10-1629780-s002.pdf [file koni-08-10-1629780-s002.pdf]
